# Supplementary material for: Estimating the potential impact of the UK government’s sugar reduction programme on child and adult health: modelling study
Source: PubMed Central journal article supplement (PMC6468887; doi:10.1136/bmj.l1417), 2019-04-17
Supplement: amib046887.ww.pdf [file amib046887.ww.pdf]

| Age group   | Variable | Total respondents | Number imputed | Percent imputed | Number self-reported | Percent self-reported |
|-------------|----------|-------------------|----------------|-----------------|----------------------|-----------------------|
| 4-10 years  | Weight   | 344               | 11             | 3.2             | 11                   | 3.2                   |
|             | Height   | 344               | 12             | 3.5             | 13                   | 3.8                   |
| 11-18 years | Weight   | 346               | 5              | 1.4             | 5                    | 1.4                   |
|             | Height   | 346               | 5              | 1.4             | 5                    | 1.4                   |
| 19-80 years | Weight   | 851               | 33             | 3.9             | 36                   | 4.2                   |
|             | Height   | 851               | 31             | 3.6             | 40                   | 4.7                   |
| 18-80 years | PAL      | 851               | 18             | 2.1             | n/a                  | n/a                   |

S1: Information on quantities of imputed data

| Inputs: |     |                |             |                |             |             |            |                       |                    | Estimated calorie change:     |                                    |                                                      |
|---------|-----|----------------|-------------|----------------|-------------|-------------|------------|-----------------------|--------------------|-------------------------------|------------------------------------|------------------------------------------------------|
| Age     | Sex | Height centile | Height (cm) | Weight centile | Weight (kg) | PA* centile | PA (METs*) | Weight change centile | Weight change (kg) | Christiansen and Garby (kcal) | Hall et al, for weight loss (kcal) | Hall et al, for subsequent weight maintenance (kcal) |
| 40      | F   | 50             | 163         | 50             | 68.6        | 50          | 1.4        | 50                    | 1.5                | 24                            | 35                                 | 27                                                   |
| 40      | M   | 90             | 185         | 50             | 83.5        | 90          | 2.6        | 10                    | 0.2                | 7                             | 15                                 | 15                                                   |
| 40      | F   | 50             | 163         | 50             | 68.6        | 50          | 1.4        | 90                    | 3.6                | 58                            | 84                                 | 64                                                   |
| 70      | F   | 10             | 153         | 10             | 54.3        | 10          | 1.9        | 50                    | 1.5                | 33                            | 48                                 | 44                                                   |
| 70      | M   | 50             | 175         | 90             | 105.1       | 10          | 1.2        | 90                    | 3.2                | 52                            | 63                                 | 32                                                   |

\* PA = Physical Activity; METs = Metabolic Equivalents

Methods used for table S2:

Due to the user interface for Hall et al, it is not possible to calculate weight change from calorie change as we did using the Christiansen and Garby method (reference 9). Instead, we were able to compare different cases of the input parameters to the models (height, weight, physical activity level and weight change) at the 10th, 50th and 90th centiles, to demonstrate cases at the centres and extremes of these inputs. These demonstrate that Hall et al generally predicted a slightly greater requirement of calorie reduction for a given weight loss.

References:

Christiansen E, Garby L. Prediction of body weight changes caused by changes in energy balance. Eur J Clin Invest. 2002;32(11):826–830

Hall KD, Sacks G, Chandramohan D, Chow CC, Wang YC, Gortmaker SL, et al. Quantification of the effect of energy imbalance on

bodyweight. *The Lancet*. 2011;378(9793):826–837

National Institute of Diabetes and Digestive and Kidney Diseases. Body Weight Planner. Available from:  
<https://www.niddk.nih.gov/bwp>
